# Supplementary material for: Association between human papillomavirus particle production and the severity of recurrent respiratory papillomatosis
Source: PubMed Central journal article supplement (PMC10079853; doi:10.1038/s41598-023-32486-8), 2023-04-06
Supplement: 41598_2023_32486_MOESM1_ESM.pdf [file 41598_2023_32486_MOESM1_ESM.pdf]

# **Association between Human Papillomavirus Particle Production and the Severity of Recurrent Respiratory Papillomatosis**

Satoshi Yamada<sup>1,2</sup>; Toshiya Itoh<sup>2,3</sup>; Taro Ikegami<sup>4</sup>; Atsushi Imai<sup>1</sup>; Daiki Mochizuki<sup>1</sup>; Hiroshi Nakanishi<sup>1</sup>; Ryuji Ishikawa<sup>1</sup>; Junya Kita<sup>1</sup>; Yuki Nakamura<sup>1</sup>; Yoshinori Takizawa<sup>1</sup>; Jun Okamura<sup>5</sup>; Yoshihiro Noda<sup>6</sup>; Toshihide Iwashita<sup>7</sup>; Takahiko Hariyama<sup>2</sup>; Mikio Suzuki<sup>4</sup>; Kiyoshi Misawa\*<sup>1</sup>; Hideya Kawasaki\*<sup>2,7</sup>

<sup>1</sup> Department of Otolaryngology/Head and Neck Surgery, Hamamatsu University School of Medicine, Hamamatsu, Japan

<sup>2</sup> Preeminent Medical Photonics Education and Research Center Institute for NanoSuit Research, Hamamatsu University School of Medicine, Hamamatsu, Japan

<sup>3</sup> Department of Obstetrics & Gynecology, Hamamatsu University School of Medicine, Hamamatsu, Japan

<sup>4</sup> Department of Otorhinolaryngology, Head and Neck Surgery, Graduate School of Medicine, University of the Ryukyus, Okinawa, Japan

<sup>5</sup> Department of Otorhinolaryngology, Seirei Hamamatsu General Hospital, Hamamatsu, Japan.

<sup>6</sup> Department of Otorhinolaryngology, Seirei Mikatahara General Hospital, Hamamatsu, Japan

<sup>7</sup> Department of Regenerative & Infectious Pathology, Hamamatsu University School of Medicine, Hamamatsu, Japan

Supplemental Figure S1. HPV sequencing analysis

Case No. 9 HPV type 6

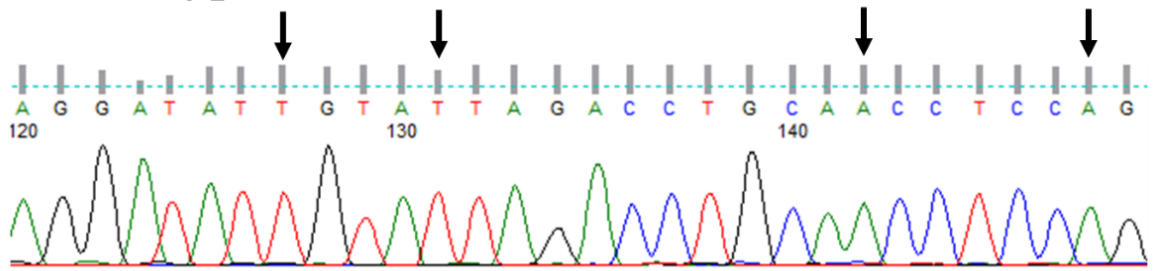

Case No. 11 HPV type 11

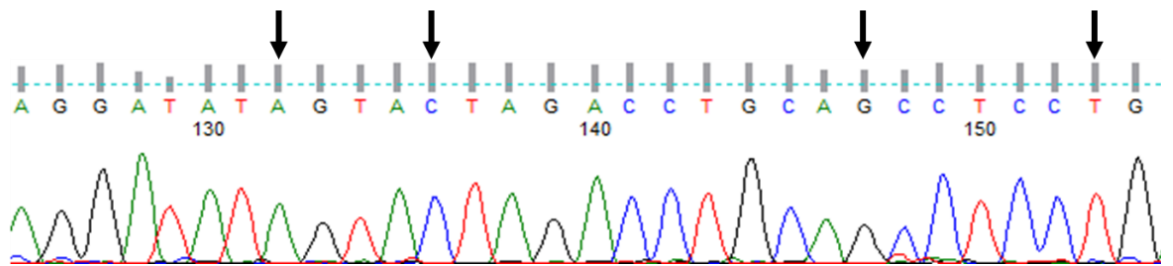

HPV type 6 and HPV type 11 sequencing results. Arrows indicate different nucleotide sequences.  
HPV: human papillomavirus

## Supplemental Figure S2. Immunoreactive score

| Intensity<br>Positive tumor cells | Weak Staining = 1 point | Moderate Staining = 2 points | Strong Staining = 3 points |
|-----------------------------------|-------------------------|------------------------------|----------------------------|
| < 10% = 1 point                   | IRS = 1                 | IRS = 2                      | IRS = 3                    |
| 10 - 50% = 2 points               | IRS = 2                 | IRS = 4                      | IRS = 6                    |
| 51 - 80% = 3 points               | IRS = 3                 | IRS = 6                      | IRS = 9                    |
| > 80% = 4 points                  | IRS = 4                 | IRS = 8                      | IRS = 12                   |

The immunoreactive score (IRS) is used to evaluate p16 IHC staining  
IHC: immunohistochemistry

**Supplemental Table S1 Detailed data on patient characteristics**

| Case No. | Operation No. from this study | Age | Sex | Smoking | Alcohol | HPV | Total operation No. | DS | Operation interval (days) | p16 IRS | L1 IHC | MIB-1 index | Viral load (Copies/ng DNA) | E2/E6 | MT |
|----------|-------------------------------|-----|-----|---------|---------|-----|---------------------|----|---------------------------|---------|--------|-------------|----------------------------|-------|----|
| 1        | 1-1                           | 43  | M   | -       | +       | 6   | 3                   | 9  | N.A.                      | 2       | -      | 54.62%      | $1.00 \times 10^6$         | 0.79  | -  |
|          | 1-2                           |     |     |         |         |     |                     | 3  | 329                       | 0       | -      | 36.22%      | $1.15 \times 10^6$         | 0.52  | -  |
| 2        | 2-1                           | 30  | M   | +       | +       | 6   | 5                   | 8  | -                         | 6       | -      | 31.42%      | $3.94 \times 10^6$         | 1.11  | -  |
|          | 2-2                           |     |     |         |         |     |                     | 7  | 664                       | 6       | -      | 22.77%      | $2.42 \times 10^6$         | 0.71  | -  |
|          | 2-3                           |     |     |         |         |     |                     | 7  | 302                       | 6       | +      | 39.59%      | $6.48 \times 10^5$         | 0.77  | -  |
|          | 2-4                           |     |     |         |         |     |                     | 7  | 1190                      | 4       | -      | 20.28%      | N.A.                       | N.A.  | -  |
|          | 2-5                           |     |     |         |         |     |                     | 5  | 1078                      | 2       | -      | 36.38%      | $2.79 \times 10^6$         | 0.57  | -  |
| 3        | 3-1                           | 42  | M   | +       | +       | 6   | 2                   | 4  | -                         | 0       | -      | 17.95%      | $2.72 \times 10^6$         | 0.64  | -  |
|          | 3-2                           |     |     |         |         |     |                     | 5  | 896                       | 2       | -      | 28.68%      | $2.63 \times 10^6$         | 0.38  | -  |
| 4        | 4-1                           | 57  | M   | +       | +       | 6   | 5                   | 8  | N.A.                      | 2       | -      | 39.66%      | $4.05 \times 10^6$         | 0.78  | -  |
|          | 4-2                           |     |     |         |         |     |                     | 5  | 688                       | 6       | -      | 47.81%      | $2.27 \times 10^6$         | 0.86  | -  |
| 5        | 5-1                           | 47  | M   | +       | +       | 11  | 10                  | 12 | N.A.                      | 1       | +      | 34.16%      | $2.79 \times 10^6$         | 0.51  | -  |
|          | 5-2                           |     |     |         |         |     |                     | 10 | 49                        | 1       | +      | 27.44%      | $4.96 \times 10^6$         | 0.37  | -  |
|          | 5-3                           |     |     |         |         |     |                     | 10 | 34                        | 1       | -      | 31.47%      | $6.34 \times 10^6$         | 0.15  | -  |
|          | 5-4                           |     |     |         |         |     |                     | 8  | 113                       | 2       | +      | 58.57%      | $4.52 \times 10^6$         | 0.34  | -  |
|          | 5-5                           |     |     |         |         |     |                     | 6  | 92                        | 4       | -      | 18.94%      | $1.40 \times 10^6$         | 0.16  | -  |
| 6        | 6-1                           | 70  | M   | +       | +       | -   | 3                   | 3  | -                         | 1       | -      | 0.60%       | -                          | -     | -  |
|          | 6-2                           |     |     |         |         |     |                     | 5  | 2542                      | 0       | -      | 58.93%      | -                          | -     | -  |
|          | 6-3                           |     |     |         |         |     |                     | 5  | 743                       | 0       | -      | 63.71%      | -                          | -     | +  |
| 7        | 7-1                           | 54  | F   | -       | -       | -   | 1                   | 6  | -                         | 0       | -      | 54.93%      | -                          | -     | +  |
| 8        | 8-1                           | 52  | M   | -       | +       | 6   | 8                   | 10 | N.A.                      | 4       | +      | 47.51%      | $4.01 \times 10^6$         | 0.60  | -  |
|          | 8-2                           |     |     |         |         |     |                     | 7  | 63                        | 1       | -      | 56.60%      | $1.63 \times 10^6$         | 0.96  | -  |
|          | 8-3                           |     |     |         |         |     |                     | 9  | 108                       | 1       | -      | N.A.        | $1.66 \times 10^6$         | 0.61  | -  |
|          | 8-4                           |     |     |         |         |     |                     | 6  | 93                        | 1       | -      | 40.19%      | $1.79 \times 10^6$         | 1.53  | -  |
|          | 8-5                           |     |     |         |         |     |                     | 4  | 187                       | 0       | -      | N.A.        | $1.38 \times 10^6$         | 0.62  | -  |
|          | 8-6                           |     |     |         |         |     |                     | 6  | 211                       | 4       | +      | 56.77%      | $2.93 \times 10^6$         | 0.67  | -  |
| 9        | 9-1                           | 46  | M   | +       | +       | 6   | 3                   | 5  | N.A.                      | 6       | -      | 45.10%      | $2.95 \times 10^6$         | 0.60  | -  |
| 10       | 10-1                          | 45  | F   | +       | -       | 6   | 1                   | 3  | -                         | 4       | -      | 17.95%      | $2.81 \times 10^6$         | 0.66  | -  |

|    |       |    |   |   |   |    |    |    |      |   |   |        |                    |      |   |
|----|-------|----|---|---|---|----|----|----|------|---|---|--------|--------------------|------|---|
| 11 | 11-1  | 42 | M | + | - | -  | 2  | 5  | 180  | 2 | - | 6.08%  | -                  | -    | - |
| 12 | 12-1  | 43 | M | + | + | 6  | 2  | 5  | 732  | 4 | + | N.A.   | $2.89 \times 10^7$ | 0.82 | - |
| 13 | 13-1  | 49 | M | + | - | 6  | 1  | 3  | -    | 4 | - | N.A.   | -                  | -    | - |
| 14 | 14-1  | 69 | M | + | + | 11 | 1  | 3  | -    | 8 | - | 26.61% | $2.29 \times 10^5$ | 0.23 | - |
| 15 | 15-1  | 66 | F | - | - | 11 | 1  | 3  | -    | 6 | - | 29.07% | $1.78 \times 10^6$ | 0.07 | - |
| 16 | 16-1  | 75 | M | + | + | 11 | 1  | 3  | -    | 2 | - | 14.61% | $2.61 \times 10^5$ | 0.27 | - |
| 17 | 17-1  | 70 | M | + | + | -  | 1  | 3  | -    | 6 | - | 33.53% | -                  | -    | - |
| 18 | 18-1  | 50 | M | + | + | 11 | 1  | 5  | -    | 8 | - | 3.65%  | $1.08 \times 10^7$ | 0.40 | - |
| 19 | 19-1  | 86 | M | + | + | -  | 2  | 8  | -    | 1 | - | 29.31% | -                  | -    | - |
|    | 19-2  |    |   |   |   |    |    | 4  | 35   | 1 | - | 12.28% | -                  | -    | - |
| 20 | 20-1  | 47 | M | + | + | 11 | 1  | 4  | -    | 6 | + | 35.17% | N.A.               | N.A. | - |
| 21 | 21-1  | 44 | M | - | + | -  | 1  | 4  | -    | 4 | - | 17.25% | -                  | -    | - |
| 22 | 22-1  | 45 | M | + | + | 11 | 16 | 6  | -    | 4 | + | 28.71% | $3.65 \times 10^6$ | 0.28 | - |
|    | 22-2  |    |   |   |   |    |    | 10 | 182  | 4 | + | 56.46% | $6.33 \times 10^6$ | 0.45 | - |
|    | 22-3  |    |   |   |   |    |    | 5  | 74   | 8 | + | 43.10% | $4.57 \times 10^6$ | 0.44 | - |
|    | 22-4  |    |   |   |   |    |    | 10 | 290  | 6 | + | 54.30% | $1.17 \times 10^6$ | 0.34 | - |
|    | 22-5  |    |   |   |   |    |    | 3  | 81   | 4 | + | 55.24% | $2.29 \times 10^6$ | 0.31 | - |
|    | 22-6  |    |   |   |   |    |    | 14 | 222  | 1 | - | 28.72% | $9.87 \times 10^6$ | 0.27 | - |
|    | 22-7  |    |   |   |   |    |    | 10 | 173  | 1 | - | N.A.   | $3.58 \times 10^5$ | 0.30 | - |
|    | 22-8  |    |   |   |   |    |    | 6  | 200  | 4 | - | 54.88% | $8.80 \times 10^5$ | 0.36 | - |
|    | 22-9  |    |   |   |   |    |    | 8  | 138  | 4 | + | 60.96% | $4.74 \times 10^6$ | 0.24 | - |
|    | 22-10 |    |   |   |   |    |    | 8  | 198  | 4 | + | 55.11% | $3.07 \times 10^6$ | 0.33 | - |
|    | 22-11 |    |   |   |   |    |    | 10 | 91   | 1 | + | 51.42% | $1.17 \times 10^6$ | 0.33 | - |
|    | 22-12 |    |   |   |   |    |    | 5  | 105  | 4 | + | 31.55% | $1.92 \times 10^6$ | 0.30 | - |
|    | 22-13 |    |   |   |   |    |    | 8  | 336  | 4 | + | 59.73% | $1.69 \times 10^7$ | 0.25 | - |
|    | 22-14 |    |   |   |   |    |    | 5  | 119  | 6 | - | N.A.   | $9.97 \times 10^5$ | 0.28 | - |
|    | 22-15 |    |   |   |   |    |    | 4  | 490  | 9 | - | N.A.   | $7.47 \times 10^5$ | 0.22 | - |
|    | 22-16 |    |   |   |   |    |    | 4  | 213  | 1 | - | 45.48% | $6.54 \times 10^6$ | 0.29 | - |
| 23 | 23-1  | 58 | M | + | + | 6  | 4  | 10 | -    | 6 | - | 34.47% | $2.76 \times 10^6$ | 0.60 | - |
|    | 23-2  |    |   |   |   |    |    | 3  | 1022 | 4 | - | 59.45% | $2.27 \times 10^6$ | 0.56 | - |
|    | 23-3  |    |   |   |   |    |    | 3  | 613  | 4 | + | 39.43% | $6.78 \times 10^6$ | 0.52 | - |
|    | 23-4  |    |   |   |   |    |    | 4  | 76   | 6 | + | 36.16% | $3.89 \times 10^6$ | 0.61 | - |

|    |      |    |   |   |   |   |   |   |      |   |   |        |                    |      |   |
|----|------|----|---|---|---|---|---|---|------|---|---|--------|--------------------|------|---|
| 24 | 24-1 | 59 | M | + | - | - | 1 | 8 | -    | 2 | - | 25.16% | -                  | -    | - |
| 25 | 25-1 | 37 | M | + | + | - | 1 | 4 | -    | 2 | - | N.A.   | -                  | -    | - |
| 26 | 26-1 | 42 | M | + | + | 6 | 2 | 8 | N.A. | 4 | + | 61.98% | $3.05 \times 10^6$ | 0.83 | - |
| 27 | 27-1 | 62 | M | + | + | - | 1 | 4 | -    | 6 | - | 45.63% | -                  | -    | + |
| 28 | 28-1 | 31 | M | + | - | 6 | 3 | 4 | -    | 6 | - | 43.35% | $2.17 \times 10^6$ | 0.46 | - |
|    | 28-2 |    |   |   |   |   |   | 3 | 241  | 6 | - | 45.24% | $3.46 \times 10^6$ | 0.51 | - |
|    | 28-3 |    |   |   |   |   |   | 4 | 1557 | 6 | - | 41.23% | $2.29 \times 10^6$ | 0.53 | - |
| 29 | 29-1 | 77 | M | + | + | - | 1 | 4 | -    | 0 | - | 11.58% | -                  | -    | - |

M: male, F: female, DS: Derkay score, IRS: immunoreactive score, MT: malignant transformation, N.A.: not available (due to missing data or insufficient samples)

**Supplemental Table S2. Real time PCR primers set**

| Real-time PCR primers | Sequence (5'-3')        | bp  |
|-----------------------|-------------------------|-----|
| HPV6 E2-F             | TGAGTATAGTATGGAACCGTGGA | 100 |
| HPV6 E2-R             | CTTCTACAGTTTTGCCCCGT    |     |
| HPV6 E6-F             | GCTACCTGTGTCACAAACCG    | 100 |
| HPV6 E6-R             | CAGCGACCCTTCCACGTA      |     |
| HPV11 E2-F            | GACCGTCCACTAACAACACC    | 102 |
| HPV11 E2-R            | TCCTTCTTTGGTGCTTGTTGT   |     |
| HPV11 E6-F            | CAAGCCGTTGTGTGAAATAGAA  | 100 |
| HPV11 E6-R            | CCAGCAGTGTAAGCAACGAC    |     |
| ACTB-F                | TGCCCTCATTTCCTCTCAG     | 101 |
| ACTB-R                | CGTACAGGTCTTTGCGGATG    |     |

PCR: polymerase chain reaction
